# Supplementary material
Source: PubMed Central journal article supplement (PMC2892858)
Supplement: NIHMS199945-supplement-1_si_001.pdf [file NIHMS199945-supplement-1_si_001.pdf]

### Contrast Agent Synthesis and Characterization

The amide bond formation reaction was optimized for pH. The highest number of Gd(III) per molecule was achieved at pH 6 and 7 (Figure S1).

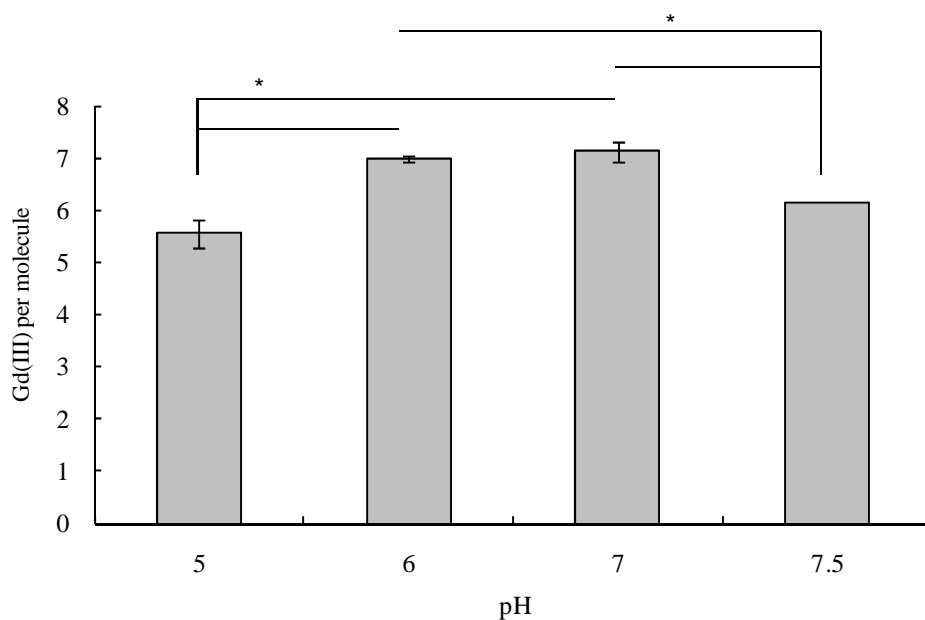

**Figure S1.** Number of Gd(III) chelates conjugated to a K8-30 backbone versus pH of the conjugation reaction in MES buffer with EDC and Sulfo-NHS. Reactions with pH 6 and pH 7 are statistically higher than pH 5 and pH 7.5. \* indicates  $p < .01$

Molecular weights of molecules close to or greater than 100 kDa are very difficult to obtain using traditional MALDI instruments because the high molar mass hinders the creation of gas-phase ions.<sup>36</sup> Very high laser powers are necessary to obtain these ions. We were only able to measure the molecular weight of one of the three K8-120 conjugations and thus used that molecular weight for calculating the conjugation efficiency.

Cation exchange chromatography of the PPCA elutes as a single peak, indicating the purity of the conjugate (Figure S2A). Although the PPCA does not have as low a polydispersity as the protein polymer itself, it nonetheless maintains a very low PDI of 1.003 (Figure S2B). This monodispersity agrees to earlier findings of these protein polymer-based conjugates where polydispersity increased from a PDI of 1.000 for the protein polymer alone to a maximum of 1.011.<sup>32</sup> Most of the conjugates had a PDI less than 1.005, similar to the K8-30 CA.

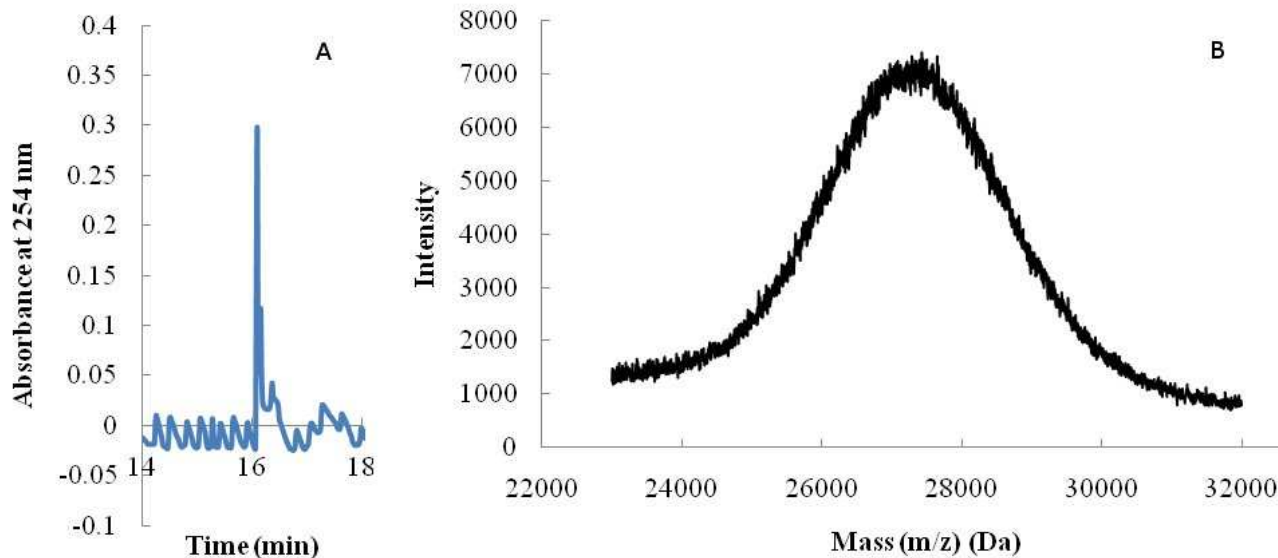

**Figure S2.** A) Cation exchange chromatography trace of K8-30 CA using a mono S cation exchange column. Peak indicates the elution of the contrast agent. B) MALDI-TOF trace of elution, confirming molecular weight.  $M_w = 27384$  Da;  $M_n = 27299$  Da; PDI = 1.003.

### PPCA Degradation

In addition to degradation by plasmin, trypsin can digest the PPCAs (Figure S3).

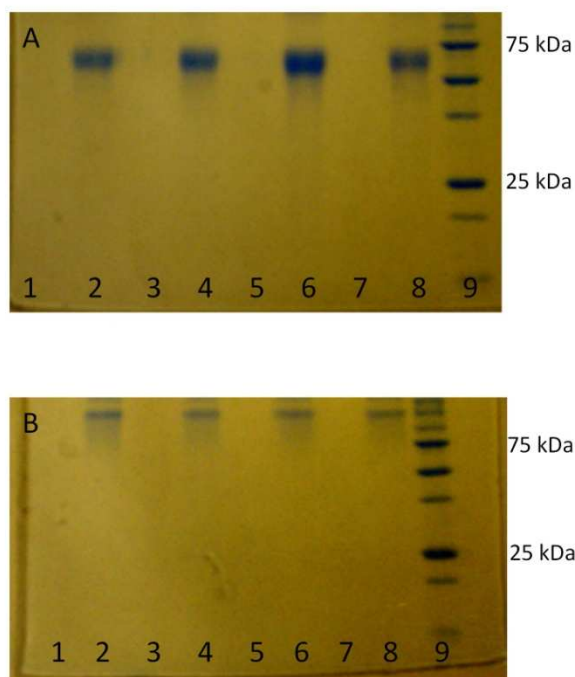

**Figure S3.** Degradation of K8-60 PPCA (A) and K8-120 PPCA (B) by trypsin. Lane 1) with trypsin, 30 minutes; Lane 2) without trypsin, 30 minutes; Lane 3) with trypsin, 60 minutes; Lane 4) without trypsin, 30 minutes; Lane 5) with trypsin, 3 hours; Lane 6) without trypsin, 3 hours; Lane 7) with trypsin, 6 hours; Lane 8) without trypsin, 6 hours; Lane 9) Molecular weight marker

### Viability

MIN6 cells were also incubated for longer periods of time with PPCAs to assess viability.

Viability at 24 and 48 hours of incubation with the K8-30 PPCA was greater than 95% (Figure S4).

Supp

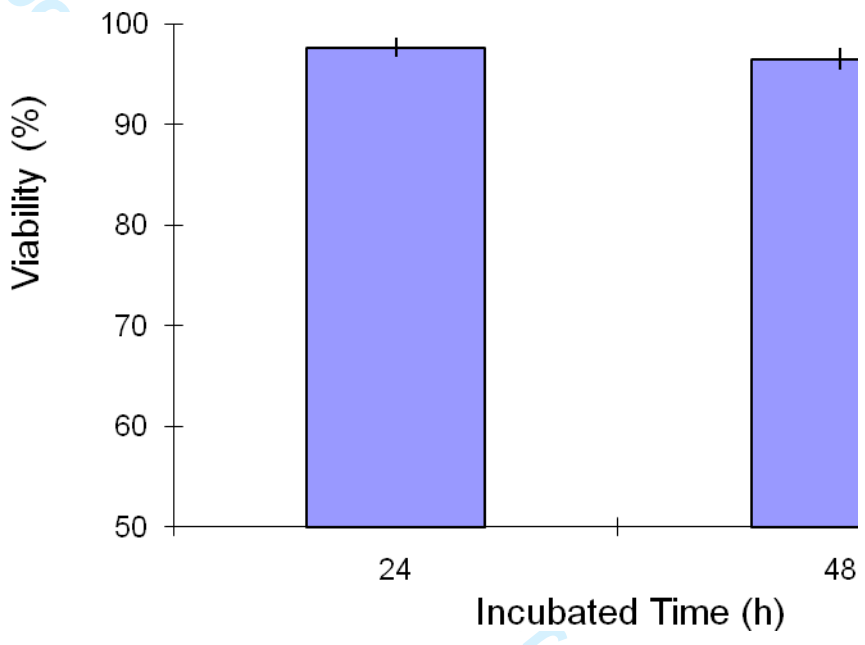

**Figure S4.** Incubation of MIN6 cells with the K8-30 PPCA for 24 and 48 hours.

view Only - Not for Publication
